# Supplementary material
Source: HighWire-hosted journal article supplement (https://qdcxjkg.com/highwire/filestream/112851/field_highwire_adjunct_files/4/Table_E3_nov2_2005.pdf)
Supplement: Table_E3_nov2_2005.pdf [file Table_E3_nov2_2005.pdf]

Table E3. Number of exacerbations/year on maintenance\*.

|                                | CS              | SS               | p    |
|--------------------------------|-----------------|------------------|------|
| <b>All exacerbations</b>       | 1.02 (0.7;1.3)  | 0.75 (0.4;1.1)   | 0.04 |
| <b>By type of exacerbation</b> |                 |                  |      |
| Eosinophilic                   | 0.36 ( 0.1;0.6) | 0.06 (0.01;0.02) | 0.02 |
| Non-eosinophilic               | 0.47 (0.3;0.7)  | 0.58 (0.2;0.9)   | NS   |
| <b>By asthma severity</b>      |                 |                  |      |
| Very mild to mild              | 0.6 (0.1;1.0)   | 0,50 (0.1;0.9)   | NS   |
| Moderate to severe             | 1.2 (0.8;1.8)   | 0.8 (0.3;1.4)    | 0.01 |
| <b>By LABA use</b>             |                 |                  |      |
| On LABA                        | 1.3 (0.8;1.8)   | 0.6(0.1; 1.1)    | 0.01 |
| Not on LABA                    | 0.7 (0.4;1.0)   | 0.8 (0.3;1.3)    | NS   |

\* Expressed as mean (95 confidence interval)

Asthma severity as in Table E1.

LABA = long acting B<sub>2</sub> agonist.
